# Supplementary material for: Bridging Emergency Care Training Gaps Through In-Situ Interdisciplinary Simulation: A Pilot Study from a Tertiary Hospital in Rwanda
Source: Research Square preprint supplement (doi:10.21203/rs.3.rs-6856106/v1), 2025-07-23
Supplement: Supplementary file 1 [file 3ee29ff56253b0cbe9407e63.docx]

**SUPPLEMENTARY MATERIALS:** Post In-Situ Simulation Survey

English // Kinyarwandan

Team Dynamics Simulation Post-Survey

1. This survey is anonymous and will not be used for promotional purposes. Your

responses will not be reported to any employers or impact your employment.

Please complete this survey independently and honestly, reflecting on what you

have learned. Select "I agree" if you agree to the following statements.

//

Iri ni isuzumabumenyi kugira ngo harebwe ubumenyi mwakuye mu myitozo

mwahawe na Dr. Tsion Firew yo kuzanzamura umurwayi muri serivisi ya urgence. Icyo turimo

Kwibandaho ni uburyo ubumenyi mwahawe muri iyo myitozo bubafasha mu mikorere yanyu ya

Buri munsi, cyane cyane iyo muri itsinda ry’abaganga n’abaforomo riteranye kugira ngo

ryite ku murwayi urembye cyane. Iri suzumabumenyi rikozwe mw’ibanga kandi ibisubizo

Byawe ntibizamenyeshwa umukoresha wawe cyangwa ngo bikugireho ingaruka iyariyo

yose. Ese uremera gusubiza iri suzumabumenyi mu bwisanzure kandi uvugishije ukuri,

Ukanagaragaza ibyo wize?

Mark only one oval.

I agree // Ndabyemera

I disagree // Simbyemera

1. Did you participate in the team dynamics training with Dr. Tsion Firew in the

Emergency Department in the past three months (in the resuscitation room)?

//

Ese waba waritabiriye imyitozo yo kuzanzamura umurwayi yakoreshejwe na Dr.

Tsion Firew muri serivisi ya urgence (A&E Department) mu mezi atatu ashize?

Mark only one oval.

Yes // Yego

No // Oya

Not sure // Simbizi

1. What is your role in the Emergency Department?

//

Ni uwuhe mwuga ukora muri serivisi ya urgence (A&E Department)?

Mark only one oval.

Physician // Umuganga

Resident // Umurezida

Nurse // Umuforomo/umuforomokazi

Technician // Umutekinisiye

Other // Ibindi

1. Have you participated in simulation training before?

//

Haba harindi myitozo nk’iyi waba warigeze uhabwa mbere?

Mark only one oval.

Yes // Yego

No // Oya

Unsure // Simbizi

1. On a scale of 1-5, how helpful did you find simulation-based learning (1 - not helpful to 5 - very helpful)

//

Ku gipimo cya 1-5, ni ku ruhe rugero wabonye kwiga ukoresheje “simulation” bifasha? (1 – ntibifasha kugeza kuri 5 – birafasha cyane)

Mark only one oval.

1- Not helpful // ntibifasha kugeza kuri

2

3

4

5- Very helpful // birafasha cyane

1. On a scale of 1-5, how likely are you to apply what you learned during the

simulation session in real clinical practice? (1 - less likely to 5 - very likely)

//

Ku gipimo cya 1-5, ni ku ruhe rugero wumva wakoresha ibyo wigiye muri simulation

mu kazi kawe ka buri munsi? (1 – sinabikoresha kugeza kuri 5 – nabikoresha cyane)

Mark only one oval.

1- Not likely // sinabikoresha kugeza kuri

2

3

4

5- Very likely // nabikoresha cyane

1. On a scale of 1-5, how helpful were the cases for your clinical practice? (1 - not

helpful, 5 - very helpful)

//

Ku gipimo cya 1-5, ni ku ruhe rugero iyi myitozo wumva yaragufashije mu kazi

kawe ka buri munsi? (1 - ntabwo yamfashije kugeza kuri 5 - yaramfashije cyane)

Mark only one oval.

1- Not helpful // ntabwo yamfashije kugeza kuri

2

3

4

5- Very helpful // yaramfashije cyane

*Content Assessment (Isuzuma ry’ibikubiye mu masomo)*

The next few questions are some concepts you learned from the session. Please answer the

questions without consulting or discussing anyone or any resources.

//

Ibi bibazo bikurikiraho birabaza bimwe mubyo wize mu myitozo. Gerageza usubize utabanje

kugisha inama cyangwa kuganira n’abandi cyangwa gukoresha ibikoresho by’inyongera.

1. The team leader asks for 1 mg of adrenaline, and the assigned nurse says "1 mg of

adrenaline given" after she administered the adrenaline. The nurse is engaging what component

of team dynamic?

//

Mu gihe bari barimo kuzanzamura umurwayi, uyoboye iryo tsinda yabwiye umuforomo yahaye

iyo nshingano ati: “Tanga miligarama imwe y’adrenaline.” Umuforomo yahise asubiza ati:

“Miligarama imwe y’adrenaline ndayitanze,” nyuma yo gutanga uwo muti. Umuforomo yakoze

iki mu rwego rwo gukorera hamwenk’itsinda?

Mark only one oval.

a) Summarizing the case // Gusobanura mu ncamake uburwayi

b) Closed loop communication // Gukoresha uburyo bwa “closed-loop communication”

c) Mutual Respect // Kubahana hagati y’abakorana

d) Knowing limitations // Kumenya aho ubushobozi bwe bugarukira

1. The team leader receives an EKG and says to the team, "this patient is having

STEMI. We should call cardiology." The team leader is engaging which part of the

team dynamic?

//

Mu gihe bari barimo kuzanzamura umurwayi, uyoboye iryo tsinda yakiriye ibisubizo

bya ECG imaze gukorwa arababwira ati: “Uyu murwayi afite STEMI. Tugomba

guhamagara cardiologist.” Uyoboye iryo tsinda yakoze iki mu rwego rwo gukorera

hamwe nk’itsinda?

Mark only one oval.

a) Constructive Intervention // Gutanga amakuru afasha abandi bari mw’itsinda

b) Mutual Respect // Kubahana hagati y’abakorana

c) Knowledge Sharing // Guhererekanya ubumenyi

d) Closed loop communication // Gukoresha uburyo bwa “closed-loop c

communication”

1. A nursing student is helping the team in the resuscitation room. The team leader asks the

nursing student to obtain IV access. The student replies to the team leader, "I don't know

how to put the IV line." The student is addressing what component of team dynamic?

//

Mu gihe bari barimo kuzanzamura umurwayi, uyoboye iryo tsinda yasabye

umunyeshuri wiga ubuforomo kubafasha, ati: “Dushyiriremo IV line”. Umunyeshuri

arasubiza ati: “Sinzi gushyiramo IV line.” Umunyeshuli yakoze iki mu rwego rwo

gukorera hamwe nk’itsinda?

Mark only one oval.

a) Disrespect to team leader // Gusuzugura umuyobozi

b) Knowing limitations // Kumenya aho ubushobozi bwe bugarukira

c) Summarizing the case // Gusobanura mu ncamake uburwayi

d) Closed-loop communications // Gukoresha uburyo bwa “closed-loop

communication”

1. What is one take-home point that you learned from the simulation sessions?

// Ni ikihe kintu kimwe cy’ingezi wigiye muri iyi myitozo?

1. What could we improve for future simulation sessions?

// Ni iki twakora kugira ngo tunoze indi myitozo y’igihe kizaza?

13. Any other feedback or comments?

// Hari indi nama cyangwa igitekerezo watanga?
